# Supplementary material
Source: Springer Nature journal article supplement (https://www.springermedizin.de/resource/supplementary/12889_2011_4512_MOESM1_ESM.pdf/9493022)
Supplement: MOESM1 [file 9493022]

**Figure 1**

| <b>Questions</b>                                       | <b>Response Alternatives</b> | <b>Analytical Categories</b> |
|--------------------------------------------------------|------------------------------|------------------------------|
| How do you perceive gender equality at your workplace? | "Completely gender equal"    | "Completely equal"           |
|                                                        | "Relatively gender equal"    | "Relatively equal"           |
|                                                        | "Not very gender equal"      | "Not equal"                  |
|                                                        | "Not at all gender equal"    |                              |
| How do you perceive your overall health?               | "Excellent"                  | "Good-rated health"          |
|                                                        | "Good"                       |                              |
|                                                        | "Fair"                       | "Poor-rated health"          |
